# Supplementary material for: Bioactivity Evaluation of a Novel Formulated Curcumin
Source: MDPI journal article supplement (doi:10.3390/nu11122982), 2019-12-06
Supplement: s1 [file s1]

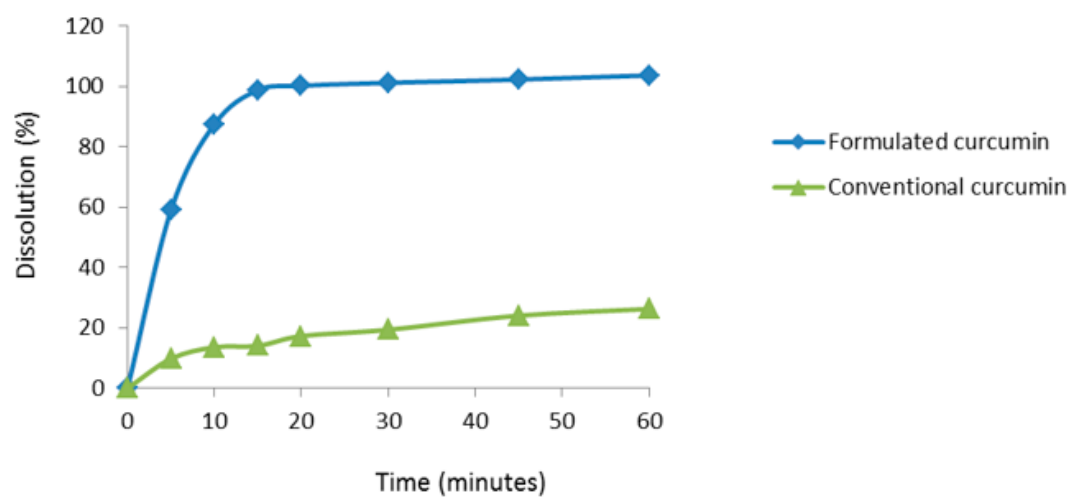

**Supplementary Figure 1.** The dissolution rates of conventional and formulated curcumin in 1% sodium dodecyl sulfate medium.

| rank | pathway name                                                           | set size | candidates contained | p-value    | q-value    | pathway source | reference (scholar) |
|------|------------------------------------------------------------------------|----------|----------------------|------------|------------|----------------|---------------------|
| 1    | Ras Signaling                                                          | 184      | 9 (4.9%)             | 0.00000000 | 0.00000000 | WikiPathways   | 23,100              |
| 2    | Ras signaling pathway - Homo sapiens (human)                           | 232      | 9 (3.9%)             | 0.00000000 | 0.00000002 | KEGG           | 23,100              |
| 3    | alpha-Linolenic acid metabolism - Homo sapiens (human)                 | 25       | 5 (20.0%)            | 0.00000000 | 0.00000007 | KEGG           | 2,710               |
| 4    | Fc-epsilon receptor I signaling in mast cells                          | 62       | 6 (9.7%)             | 0.00000000 | 0.00000007 | PID            | 197                 |
| 5    | Acyl chain remodelling of PC                                           | 28       | 5 (17.9%)            | 0.00000000 | 0.00000007 | Reactome       | 714                 |
| 6    | Linoleic acid metabolism - Homo sapiens (human)                        | 29       | 5 (17.2%)            | 0.00000000 | 0.00000007 | KEGG           | 14,400              |
| 7    | Acyl chain remodelling of PE                                           | 30       | 5 (16.7%)            | 0.00000000 | 0.00000007 | Reactome       | 1,620               |
| 8    | Adipocytokine signaling pathway - Homo sapiens (human)                 | 69       | 6 (8.7%)             | 0.00000000 | 0.00000007 | KEGG           | 1,310               |
| 9    | Pancreatic cancer - Homo sapiens (human)                               | 75       | 6 (8.0%)             | 0.00000000 | 0.00000011 | KEGG           | 48,400              |
| 10   | Oncostatin_M                                                           | 38       | 5 (13.2%)            | 0.00000000 | 0.00000019 | NetPath        | 872                 |
| 11   | Pancreatic adenocarcinoma pathway                                      | 89       | 6 (6.7%)             | 0.00000001 | 0.00000022 | WikiPathways   | 20,300              |
| 12   | Longevity regulating pathway - Homo sapiens (human)                    | 89       | 6 (6.7%)             | 0.00000001 | 0.00000022 | KEGG           | 11,700              |
| 13   | phospholipases                                                         | 41       | 5 (12.2%)            | 0.00000001 | 0.00000022 | HumanCyc       | 16,600              |
| 14   | RAGE                                                                   | 45       | 5 (11.1%)            | 0.00000001 | 0.00000031 | NetPath        | 5,300               |
| 15   | Prostate cancer - Homo sapiens (human)                                 | 97       | 6 (6.2%)             | 0.00000001 | 0.00000031 | KEGG           | 54,400              |
| 16   | Ether lipid metabolism - Homo sapiens (human)                          | 47       | 5 (10.6%)            | 0.00000001 | 0.00000037 | KEGG           | 24,000              |
| 17   | Acyl chain remodelling of PI                                           | 17       | 4 (23.5%)            | 0.00000001 | 0.00000040 | Reactome       | 1,550               |
| 18   | thioredoxin pathway                                                    | 4        | 3 (75.0%)            | 0.00000002 | 0.00000044 | HumanCyc       | 9,290               |
| 19   | Acyl chain remodelling of PG                                           | 19       | 4 (21.1%)            | 0.00000002 | 0.00000057 | Reactome       | 284                 |
| 20   | IL1                                                                    | 54       | 5 (9.3%)             | 0.00000003 | 0.00000057 | NetPath        | 16,900              |
| 21   | Cardiac Hypertrophic Response                                          | 54       | 5 (9.3%)             | 0.00000003 | 0.00000057 | WikiPathways   | 22,000              |
| 22   | RANKL-RANK (Receptor activator of NFkB (ligand)) Signaling Pathway     | 55       | 5 (9.1%)             | 0.00000003 | 0.00000060 | WikiPathways   | 337                 |
| 23   | Acyl chain remodelling of PS                                           | 23       | 4 (17.4%)            | 0.00000005 | 0.00000108 | Reactome       | 356                 |
| 24   | Arachidonic acid metabolism - Homo sapiens (human)                     | 63       | 5 (7.9%)             | 0.00000006 | 0.00000110 | KEGG           | 19,200              |
| 25   | Oncostatin M Signaling Pathway                                         | 65       | 5 (7.7%)             | 0.00000007 | 0.00000123 | WikiPathways   | 896                 |
| 26   | Acute myeloid leukemia - Homo sapiens (human)                          | 66       | 5 (7.6%)             | 0.00000007 | 0.00000124 | KEGG           | 21,500              |
| 27   | AGE-RAGE pathway                                                       | 66       | 5 (7.6%)             | 0.00000007 | 0.00000124 | WikiPathways   | 634                 |
| 28   | Glycerophospholipid metabolism                                         | 136      | 6 (4.4%)             | 0.00000008 | 0.00000128 | EHMN           | 881                 |
| 29   | RAC1-PAK1-p38-MMP2 Pathway                                             | 68       | 5 (7.4%)             | 0.00000008 | 0.00000134 | WikiPathways   | 58                  |
| 30   | TWEAK                                                                  | 28       | 4 (14.3%)            | 0.00000012 | 0.00000191 | NetPath        | 744                 |
| 31   | Leptin signaling pathway                                               | 76       | 5 (6.6%)             | 0.00000015 | 0.00000213 | WikiPathways   | 11,500              |
| 32   | Chronic myeloid leukemia - Homo sapiens (human)                        | 76       | 5 (6.6%)             | 0.00000015 | 0.00000213 | KEGG           | 18,500              |
| 33   | IL17 signaling pathway                                                 | 31       | 4 (12.9%)            | 0.00000019 | 0.00000266 | WikiPathways   | 5,120               |
| 34   | Selenium Micronutrient Network                                         | 83       | 5 (6.0%)             | 0.00000023 | 0.00000313 | WikiPathways   | 3,620               |
| 35   | Resistin as a regulator of inflammation                                | 33       | 4 (12.1%)            | 0.00000024 | 0.00000326 | WikiPathways   | 2,690               |
| 36   | TP53 Regulates Metabolic Genes                                         | 86       | 5 (5.8%)             | 0.00000027 | 0.00000353 | Reactome       | 4,660               |
| 37   | Apoptosis                                                              | 87       | 5 (5.7%)             | 0.00000029 | 0.00000364 | WikiPathways   | 138,000             |
| 38   | Caloric restriction and aging                                          | 9        | 3 (33.3%)            | 0.00000035 | 0.00000411 | WikiPathways   | 12,500              |
| 39   | Role Altered Glycolysation of MUC1 in Tumour Microenvironment          | 9        | 3 (33.3%)            | 0.00000035 | 0.00000411 | WikiPathways   | 471                 |
| 40   | Suppression of HMGB1 mediated inflammation by THBD                     | 9        | 3 (33.3%)            | 0.00000035 | 0.00000411 | WikiPathways   | 0                   |
| 41   | IL2 signaling events mediated by PI3K                                  | 37       | 4 (10.8%)            | 0.00000039 | 0.00000447 | PID            | 3,490               |
| 42   | Small cell lung cancer - Homo sapiens (human)                          | 93       | 5 (5.4%)             | 0.00000040 | 0.00000448 | KEGG           | 64,200              |
| 43   | Selenium Metabolism and Selenoproteins                                 | 38       | 4 (10.5%)            | 0.00000044 | 0.00000476 | WikiPathways   | 1,650               |
| 44   | Kaposi sarcoma-associated herpesvirus infection - Homo sapiens (human) | 186      | 6 (3.2%)             | 0.00000049 | 0.00000517 | KEGG           | 3,900               |
| 45   | Glycerophospholipid metabolism - Homo sapiens (human)                  | 97       | 5 (5.2%)             | 0.00000050 | 0.00000517 | KEGG           | 881                 |
| 46   | Synthesis of PA                                                        | 40       | 4 (10.0%)            | 0.00000054 | 0.00000549 | Reactome       | 60,100              |
| 47   | TNF related weak inducer of apoptosis (TWEAK) Signaling Pathway        | 41       | 4 (9.8%)             | 0.00000060 | 0.00000595 | WikiPathways   | 18,400              |
| 48   | MicroRNAs in cardiomyocyte hypertrophy                                 | 102      | 5 (4.9%)             | 0.00000064 | 0.00000622 | WikiPathways   | 3,040               |
| 49   | Insulin resistance - Homo sapiens (human)                              | 107      | 5 (4.7%)             | 0.00000081 | 0.00000774 | KEGG           | 39,200              |
| 50   | Cellular responses to stress                                           | 345      | 7 (2.0%)             | 0.00000104 | 0.00000960 | Reactome       | 67,400              |

**Supplementary Figure 2.** Prediction of highly correlated pathways. Differentially expressed genes from curcumin and formulated curcumin data sets were used to query CPDB in order to predict the pathways in which these genes were likely participating. The top 50 prediction pathways were identified according to analysis using the CPDB database ( $q < 0.001$ ). The apoptosis was analyzed in this study (highlighted in yellow), whereas Suppression of HMGB1 mediated inflammation by THBD is a relatively novel pathway to be validated in the future.

(A)

| HepG2 |                                        |                                                                                                                            |                           |       |
|-------|----------------------------------------|----------------------------------------------------------------------------------------------------------------------------|---------------------------|-------|
| Rank  | Name                                   | Target                                                                                                                     | PCL                       | Score |
| 1     | iodoacetic-acid                        | LCP3                                                                                                                       |                           | 99.4  |
| 2     | tretinoin                              | RARG, RORB, ALDH1A1, ALDH1A2, GPRC5A, NR0B1, NR2C2, PPARG, RARA, RARB, RARRES1, RORC, RXRB, RXRG                           | Retinoid receptor agonist | 98.84 |
| 3     | Ala-Ala-Phe-CMK                        | TPP2                                                                                                                       |                           | 98.73 |
| 4     | WR-216174                              | N/A                                                                                                                        |                           | 98.7  |
| 5     | sappanone-a                            | Nrf2                                                                                                                       |                           | 98.41 |
| 6     | caffeic-acid                           | ALOX5, MIF, RELA, TNF                                                                                                      |                           | 98.17 |
| 7     | AG-957                                 | ABL1, EGFR                                                                                                                 |                           | 97.77 |
| 8     | capsazepine                            | TRPV1, TRPV4                                                                                                               |                           | 97.42 |
| 9     | 4-hydroxy-2-nonenal                    | IKBKB                                                                                                                      |                           | 97.4  |
| 10    | pifithrin-mu                           | HSPA1A, TP53                                                                                                               |                           | 97.36 |
| 11    | tosyl-phenylalanyl-chloromethyl-ketone | NF-kB, c-myc, CASP3                                                                                                        |                           | 97.32 |
| 12    | SA-792709                              | RARA, RARB                                                                                                                 |                           | 97.26 |
| 13    | SSR-69071                              | ELANE                                                                                                                      |                           | 97.22 |
| 14    | 15-delta-prostaglandin-j2              | PPARG, NR1H4                                                                                                               | PPAR receptor agonist     | 96.97 |
| 15    | BCL2-inhibitor                         | BCL2                                                                                                                       | BCL inhibitor             | 96.95 |
| 16    | quinidine                              | SCN5A, ABCB1, CYP2D6, KCNA5, KCNA7, KCNH1, KCNH2, KCNH5, KCNK1, KCNK6, SLC29A4                                             | Sodium channel blocker    | 96.88 |
| 17    | isoliquritigenin                       | AKR1B1, HRH2, SIRT1                                                                                                        |                           | 96.72 |
| 18    | parthenolide                           | ADIPOR2, IKBKB, RELA                                                                                                       | NFkB pathway inhibitor    | 96.69 |
| 19    | SA-792728                              | SPHK1, VCP                                                                                                                 |                           | 96.62 |
| 20    | NSC-3852                               | HDAC1                                                                                                                      | HDAC inhibitor            | 96.62 |
| 21    | SCH-58261                              | ADORA2A, ADORA1, ADORA2B, ADORA3                                                                                           |                           | 96.59 |
| 22    | LDN-193189                             | ACVR1, BMPR1A                                                                                                              |                           | 96.58 |
| 23    | menadiione                             | AOX1, BGLAP, F10, F2, F7, F9, GGCX, NQO1, NQO2, PKM, PROC, PROS1, PROZ, VKORC1, VKORC1L1                                   |                           | 96.58 |
| 24    | rhamnetin                              | ALOX5, MAPK8                                                                                                               |                           | 96.52 |
| 25    | atracurium                             | CHRNA2                                                                                                                     |                           | 96.39 |
| 26    | flavokavain-b                          | HIF1A                                                                                                                      |                           | 96.34 |
| 27    | MDM2-inhibitor                         | MDM2                                                                                                                       | MDM inhibitor             | 96.2  |
| 28    | pyrrolidine-dithiocarbamate            | HSD11B1, RELA                                                                                                              | NFkB pathway inhibitor    | 96.17 |
| 29    | sulforaphane                           | NFE2L2                                                                                                                     |                           | 96.02 |
| 30    | tyrphostin-47                          | EGFR                                                                                                                       |                           | 95.92 |
| 31    | SID-26681509                           | CTSL                                                                                                                       |                           | 95.42 |
| 32    | manumycin-a                            | FNTA, IKBKB                                                                                                                | NFkB pathway inhibitor    | 95.36 |
| 33    | radicicol                              | ACLY, DLAT, HSP90AB1, HSP90B1, MAP3K7, OPRM1, PDK3                                                                         | HSP inhibitor             | 95.33 |
| 34    | NSC-632839                             | USP2, USP7, SENP2, USP1                                                                                                    |                           | 95.31 |
| 35    | brazilin                               | RMEL3                                                                                                                      |                           | 95.3  |
| 36    | guggulsterone                          | NR1H4, PGR, AR, ESR1, IKBKB, NR1I2, NR3C1, NR3C2                                                                           |                           | 95.28 |
| 37    | UK-356618                              | MMP3, MMP13, MMP14, MMP2, MMP9                                                                                             |                           | 95.16 |
| 38    | BNTX                                   | OPRD1, OPRK1, OPRM1                                                                                                        |                           | 94.89 |
| 39    | manumycin-a                            | FNTA, IKBKB                                                                                                                |                           | 94.75 |
| 40    | NSC-663284                             | CDC25A, CDC25B, CDC25C                                                                                                     |                           | 94.61 |
| 41    | MLN-4924                               | NAE1, UBA3                                                                                                                 |                           | 94.61 |
| 42    | penicillic-acid                        | N/A                                                                                                                        |                           | 94.52 |
| 43    | 15-delta-prostaglandin-j2              | PPARG, NR1H4                                                                                                               |                           | 94.31 |
| 44    | z-leu3-VS                              | N/A                                                                                                                        | Proteasome inhibitor      | 94.3  |
| 45    | 7b-cis                                 | XPO1                                                                                                                       |                           | 94.06 |
| 46    | chaetocin                              | EHMT2, SUV39H1                                                                                                             |                           | 93.94 |
| 47    | MLN-2238                               | PSMB1                                                                                                                      | Proteasome inhibitor      | 93.88 |
| 48    | eriodictyol                            | CYP1B1, NFE2L2, XDH                                                                                                        |                           | 93.7  |
| 49    | GSK-0660                               | PPARG                                                                                                                      |                           | 93.67 |
| 50    | cucurbitacin-i                         | JAK2, STAT3                                                                                                                |                           | 93.66 |
| 51    | NSC-632839                             | USP2, USP7, SENP2, USP1                                                                                                    |                           | 93.62 |
| 52    | azacitidine                            | DNMT1                                                                                                                      |                           | 93.16 |
| 53    | tricitiribine                          | AKT1, AKT2, AKT3                                                                                                           |                           | 93.15 |
| 54    | dipropyl-dopamine                      | N/A                                                                                                                        |                           | 92.92 |
| 55    | JLK-6                                  | PSEN1                                                                                                                      | Gamma secretase inhibitor | 92.83 |
| 56    | angiogenesis-inhibitor                 | EGFR                                                                                                                       |                           | 92.8  |
| 57    | thapsigargin                           | ATP2A1                                                                                                                     | ATPase inhibitor          | 92.75 |
| 58    | MG-132                                 | PSMB1                                                                                                                      | Proteasome inhibitor      | 92.28 |
| 59    | quercetin                              | PIK3CG, AKR1B1, ATP5A1, ATP5B, ATP5C1, CYP2C8, EGFR, GAA, HCK, HIBCH, MAOA, PIM1, PTPN1, SCN5A, SIRT1, STK17B, UGT3A1, XDH |                           | 92.26 |
| 60    | RO-28-1675                             | GCK                                                                                                                        |                           | 92.21 |
| 61    | RO-90-7501                             | APP                                                                                                                        |                           | 92.02 |
| 62    | parthenolide                           | ADIPOR2, IKBKB, RELA                                                                                                       |                           | 91.99 |
| 63    | AG-592                                 | N/A                                                                                                                        |                           | 91.97 |
| 64    | piperlongumine                         | STAT3                                                                                                                      |                           | 91.91 |
| 65    | CA-074-Me                              | CTSB                                                                                                                       |                           | 91.85 |
| 66    | diphencyprone                          | N/A                                                                                                                        |                           | 91.72 |
| 67    | avrainvillamide-analog-2               | NPM1                                                                                                                       | Nucleophosmin inhibitor   | 91.51 |
| 68    | butein                                 | ACE, CXCL8, IL6, SIRT1, SRD5A1, SRD5A2, TNF                                                                                |                           | 90.84 |
| 69    | cosmosiin                              | ER $\alpha$ , ER $\beta$                                                                                                   |                           | 90.37 |
| 70    | avrainvillamide-analog-5               | NPM1                                                                                                                       | Nucleophosmin inhibitor   | 90.34 |

(B)

| HT29 |                          |                                                                                                 |                                         |       |
|------|--------------------------|-------------------------------------------------------------------------------------------------|-----------------------------------------|-------|
| Rank | Name                     | Target                                                                                          | PCL                                     | Score |
| 1    | celastrol                | IL1B, TNF                                                                                       | Topoisomerase inhibitor                 | 99.93 |
| 2    | erythrosine              | N/A                                                                                             |                                         | 99.93 |
| 3    | RO-90-7501               | APP                                                                                             |                                         | 99.72 |
| 4    | clopidogrel              | P2RY12, CYP2B6, CYP2C19, CYP3A5                                                                 |                                         | 99.58 |
| 5    | W-7                      | CALM1, CALM2, KCNA5, KCNH2, TNNC1, TNNI3                                                        |                                         | 99.34 |
| 6    | PPT                      | ESR1                                                                                            | Estrogen receptor agonist               | 99.33 |
| 7    | gatifloxacin             | N/A                                                                                             | Bacterial DNA gyrase inhibitor          | 99.26 |
| 8    | carbidopa                | DDC                                                                                             |                                         | 99.19 |
| 9    | SU-11652                 | KDR, PDGFRB, CAMK1G, FGF2, FGFR1, FLT1, KIT, PDGFRA                                             |                                         | 99.19 |
| 10   | dipropyl-dopamine        | N/A                                                                                             |                                         | 99.08 |
| 11   | n-formylmethionylalanine | N/A                                                                                             |                                         | 98.73 |
| 12   | metformin                | ACACB, INS, PRKAB1                                                                              |                                         | 98.73 |
| 13   | oxindole-I               | AKT1, KDR, PDPK1, RET                                                                           |                                         | 98.44 |
| 14   | dichloroacetic-acid      | PK1                                                                                             |                                         | 98.34 |
| 15   | acyclovir                | PNP                                                                                             |                                         | 98.14 |
| 16   | rifampicin               | NR1I2, ABCB1, CYP2B6, CYP2C19, CYP2C8, CYP3A4, CYP3A5, SLCO1A2, SLCO1B1, SLCO1B3                |                                         | 98.13 |
| 17   | thiothixene              | HTR2A, DRD1, DRD2, HRH1                                                                         |                                         | 98.06 |
| 18   | AKT-inhibitor-1-2        | AKT1, AKT2, AKT3                                                                                |                                         | 97.83 |
| 19   | methyl-angolensate       | HTR2B                                                                                           |                                         | 97.46 |
| 20   | LDN-193189               | ACVR1A, BMPR1A                                                                                  |                                         | 97.32 |
| 21   | BRD-A81377415            | CTK1, CT.K4, DYRK1A, DYRK1B                                                                     |                                         | 97.29 |
| 22   | auranofin                | IKKBK, PRDX5, TRPA1, TXNRD1, TXNRD2                                                             | NFkB pathway inhibitor                  | 97.29 |
| 23   | cefloxitin               | PBPs                                                                                            |                                         | 97.25 |
| 24   | propranolol              | ADRB2, ADRB3, ADRB1, CYP2C19, HTR1A, HTR1B                                                      |                                         | 96.86 |
| 25   | methylene-blue           | ACHE, MAPT                                                                                      |                                         | 96.85 |
| 26   | rimcazole                | SIGMAR1                                                                                         |                                         | 96.61 |
| 27   | doxazosin                | ADRA1D, ADRA1A, ADRA1B, CYP2C19, KCNH2, KCNH6, KCNH7                                            |                                         | 96.61 |
| 28   | temsirolimus             | MTOR, PTEN                                                                                      | MTOR inhibitor                          | 96.41 |
| 29   | maprotiline              | SLC6A2, ADRA1A, ADRA1B, ADRA1D, ADRA2A, ADRA2B, ADRA2C, CHRM1, CHRM2, CHRM3, CHRM4, CHRM5, DRD2 |                                         | 96.33 |
| 30   | tivozanib                | FLT1, FLT4, KDR, KIT, PDGFRA, PDGFRB                                                            | PDGFR/KIT inhibitor, VEGFR inhibitor    | 96.3  |
| 31   | BRD-K49061529            | GABRA1, GABRG2                                                                                  |                                         | 96.26 |
| 32   | H-7                      | PKIA, PRKACA, PRKAR1A                                                                           | PKA inhibitor                           | 96.11 |
| 33   | BRD-K71726959            | CDK1, CDK5                                                                                      |                                         | 96.09 |
| 34   | levonorgestrel           | PGR, AR, CYP2E1, ESR1, SRD5A1                                                                   | Progesterone receptor agonist           | 96.09 |
| 35   | BRL-37344                | ADRB3, ADRB1, ADRB2                                                                             |                                         | 95.68 |
| 36   | FK-888                   | TACR1, TACR2                                                                                    | Tachykinin antagonist                   | 95.5  |
| 37   | salvinorin-a             | OPRK1, OPRD1, OPRM1                                                                             |                                         | 95.44 |
| 38   | iproniazid               | MAOA, MAOB                                                                                      |                                         | 95.42 |
| 39   | neratinib                | EGFR, ERBB2, ERBB4, KDR                                                                         | EGFR inhibitor                          | 95.25 |
| 40   | panobinostat             | HDAC1, HDAC2, HDAC3, HDAC4, HDAC6, HDAC7, HDAC8, HDAC9                                          | HDAC inhibitor                          | 95.25 |
| 41   | ritodrine                | ADRB2                                                                                           | Beta-adrenergic receptor agonist        | 95.22 |
| 42   | SN-38                    | TOP1                                                                                            | Topoisomerase inhibitor                 | 95.17 |
| 43   | staurosporine            | CDK2, GSK3B, CAMK2B, CDK1, CDK5, CHEK1, CHRM1, CHRM2, CHRM4, CSK,                               | DAPK1, GPR35, IKKBK, ITK, LCK, LRRK2    | 95.06 |
| 44   | LY-303511                | CSNK2A1, CSNK2A2, CSNK2B, MTOR                                                                  | Bromodomain Inhibitor                   | 94.99 |
| 45   | etodolac                 | PTGS2, PTGS1, RXRA, TRPV1                                                                       |                                         | 94.89 |
| 46   | AKT-inhibitor-IV         | AKT1                                                                                            |                                         | 94.87 |
| 47   | BRD-K08438429            | GBA, SSTR4                                                                                      |                                         | 94.71 |
| 48   | ipsapirone               | HTR1A                                                                                           |                                         | 94.6  |
| 49   | roscovitine              | CDK2, CDK9, CDK7, CDK1, CDK5                                                                    | CDK inhibitor                           | 94.59 |
| 50   | PI-103                   | PIK3CA, PIK3CG, MTOR, PIK3CB, PIK3CD, PRKDC                                                     | MTOR inhibitor, PI3K inhibitor          | 94.39 |
| 51   | trap-101                 | OPRL1                                                                                           |                                         | 94.36 |
| 52   | tenofovir                | PrEP                                                                                            |                                         | 94.29 |
| 53   | ceforanide               | PBPs                                                                                            |                                         | 94.11 |
| 54   | vindesine                | TUBB, TUBB1                                                                                     | Tubulin inhibitor                       | 94.02 |
| 55   | cefotaxime               | PBPs                                                                                            | Bacterial cell wall synthesis inhibitor | 93.97 |
| 56   | NVP-TAE684               | ALK, INSR                                                                                       |                                         | 93.75 |
| 57   | bethanechol              | CHRM2, CHRM1, CHRM3, CHRM4                                                                      |                                         | 93.6  |
| 58   | amoxicillin              | SLC15A1                                                                                         |                                         | 93.58 |
| 59   | pitavastatin             | HMGCR, APOA1, CYP2C8                                                                            | HMGCR inhibitor                         | 93.57 |
| 60   | lestaurtinib             | FLT3, NTRK1, JAK2, NTRK2, NTRK3                                                                 | FLT3 inhibitor, JAK inhibitor           | 93.52 |
| 61   | menadione                | AOX1, BGLAP, F10, F2, F7, F9, GGCX, NQO1, NQO2, PKM, PROC, PROS1, PROZ,                         | VKORC1, VKORC1L1                        | 93.38 |
| 62   | calmidazolium            | ATP2B1, PDE1A                                                                                   |                                         | 93.17 |
| 63   | etoposide                | TOP2A, CYP2E1, CYP3A5, TOP2B                                                                    |                                         | 93.13 |
| 64   | testosterone             | AR, CYP19A1, CYP2C19, CYP2C8, CYP3A5                                                            |                                         | 93.06 |
| 65   | aminopurvalanol-a        | CDK1, CDK2, CDK5, CDK6                                                                          | CDK inhibitor                           | 92.99 |
| 66   | tianeptine               | SLC6A4                                                                                          |                                         | 92.97 |
| 67   | SCH-58261                | ADORA2A, ADORA1, ADORA2B, ADORA3                                                                |                                         | 92.73 |
| 68   | ampicillin               | SLC15A1                                                                                         |                                         | 92.31 |
| 69   | tyrphostin-AG-527        | EGFR                                                                                            |                                         | 92.23 |
| 70   | BRD-K98824517            | N/A                                                                                             |                                         | 92.04 |
| 71   | diflorasone              | NR3C1, PLA2G1B                                                                                  | Glucocorticoid receptor agonist         | 92    |
| 72   | glipizide                | ABCC8, KCNJ10, KCNJ11, PPARG                                                                    | KCNJ11 modulator                        | 91.97 |
| 73   | PI-828                   | PI3K                                                                                            | PI3K inhibitor                          | 91.96 |
| 74   | myriocin                 | AKT1, SPTLC1, SPTLC2, SPTLC3                                                                    |                                         | 91.9  |
| 75   | BVT-948                  | PTPN1, PTPN11, PTPN2                                                                            |                                         | 91.71 |
| 76   | GSK-1059615              | PIK3CA, PIK3CG                                                                                  | MTOR inhibitor, PI3K inhibitor          | 91.67 |
| 77   | fluocinolone             | NR3C1, SERPINA6                                                                                 |                                         | 91.65 |
| 78   | sirolimus                | MTOR, FKBP1A, CCR5, FGF2                                                                        |                                         | 91.62 |
| 79   | purvalanol-a             | CDK1, CDK2, CDK4, CDK5, CCND1, CCNE1, CSNK1G3, RPS6KA1, SRC                                     | CDK inhibitor                           | 91.59 |
| 80   | ryuvudine                | CDK4, CDK2                                                                                      |                                         | 91.25 |
| 81   | brucine                  | CHRM1, CHRM2, CHRM3, CHRM4, CHRM5                                                               |                                         | 91.02 |
| 82   | III606050                | N/A                                                                                             |                                         | 90.96 |
| 83   | mitomycin-c              | CASP8                                                                                           |                                         | 90.96 |
| 84   | cimetidine               | HRH2, SLC29A4, SLC47A1, SLC47A2                                                                 |                                         | 90.96 |
| 85   | angiogenesis-inhibitor   | EGFR                                                                                            |                                         | 90.95 |
| 86   | nisoldipine              | CACNA1C, CACNA1D, CACNA1S, CACNA2D1, CACNB2, CYP3A5                                             | Calcium channel blocker                 | 90.77 |
| 87   | BRD-K12401458            | S1PR4                                                                                           |                                         | 90.61 |
| 88   | importazole              | KPNB1                                                                                           |                                         | 90.52 |
| 89   | sulpiride                | DRD2, CA7, DRD3, CA1, CA12                                                                      |                                         | 90.29 |
| 90   | NSC-663284               | CDC25A, CDC25B, CDC25C                                                                          |                                         | 90.28 |
| 91   | PF-04217903              | MET                                                                                             |                                         | 90.23 |
| 92   | CP466722                 | ATM                                                                                             |                                         | 90.18 |

**Supplementary Figure 3.** The output data of compounds (CP, score  $\geq 90$ ) was analyzed via CLUE, and detected their similarity among these gene expression profiles (A) The gene-expression profile from HepG2 treated with formulated curcumin was analyzed by CLUE. (B) The gene-expression profile from HT29 treated with formulated curcumin was analyzed by CLUE focused on the compounds (CP) with connectivity scores greater than 90. Pattern-matching algorithms were used to score each gene expression profile and provide strength of enrichment through query signatures. The results were ranked by “connectivity score ( $\tau$ )”; a positive score of a signature denoted a similar effect, whereas a negative score indicated a contrary effect. A  $\tau$  of 90 indicated that only 10% of all perturbations exhibited strong connectivity to the query.

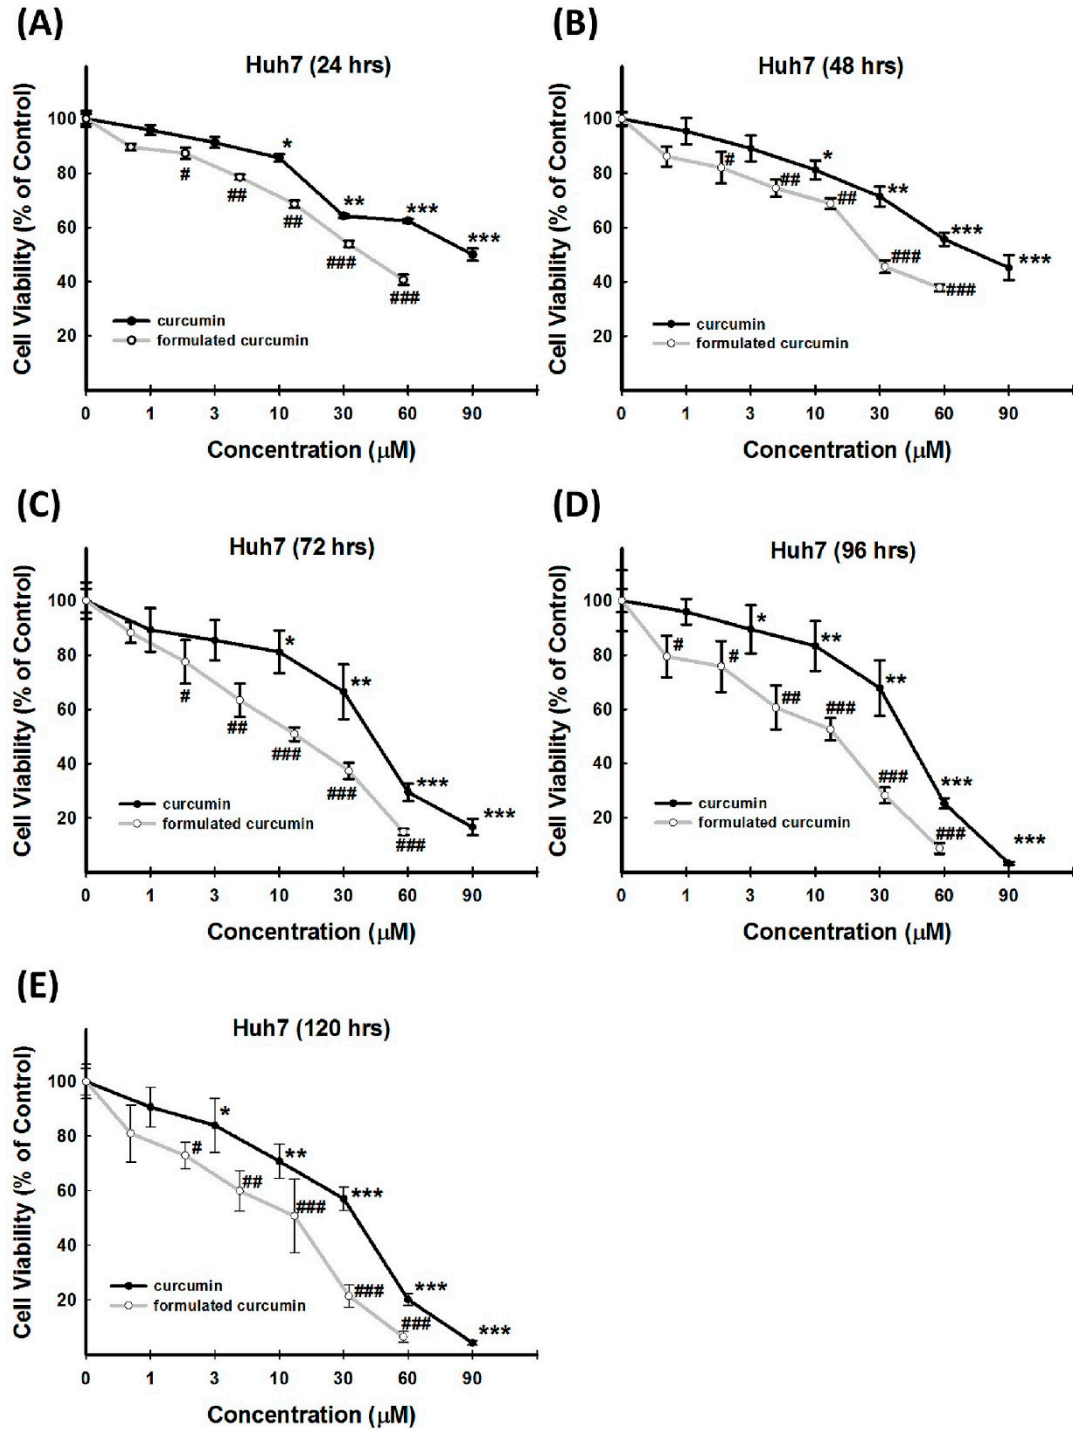

**Supplementary Figure 4.** Curcumin and the formulated curcumin affect the cell viability of Huh7 cells. After treatment with various concentrations of curcumin (conventional) or the formulated curcumin for 24, 48, 72, 96 and 120 hours, the cell viability was determined as a percentage relative to the controls. The formulated curcumin exhibited a lower IC<sub>50</sub> value than curcumin. \**P* < 0.05, \*\**P* < 0.01, \*\*\**P* < 0.005 compared with the group without curcumin (vehicle). #*P* < 0.05, ##*P* < 0.01, ###*P* < 0.005 comparison between cells treated with curcumin and the formulated curcumin.

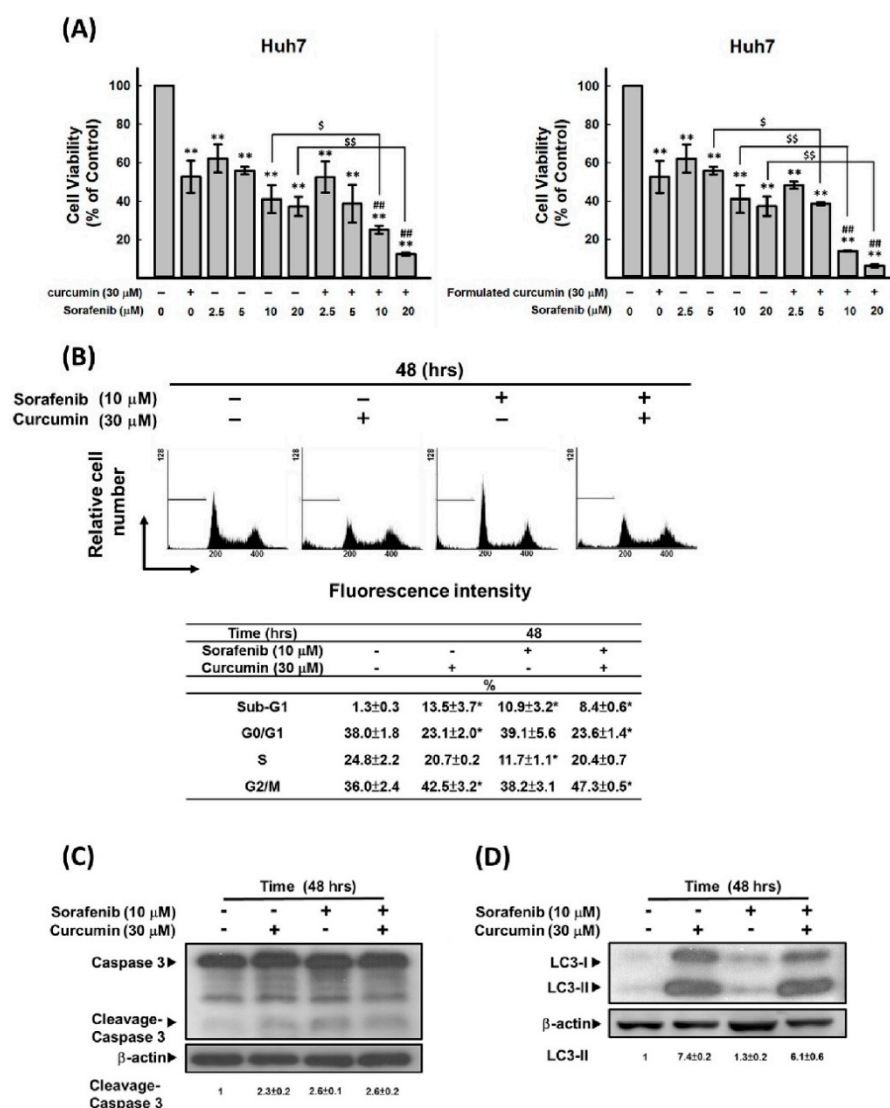

**Supplementary Figure 5.** Inhibitory effect of the combination of sorafenib and conventional or formulated curcumin on HCC cell lines. (A) Huh7 cells were treated with various concentrations of sorafenib with or without 30  $\mu$ M of conventional or formulated curcumin. Cell viability was determined using MTT assay. Data are expressed as the mean  $\pm$  SEM of three independent experiments. \* $P$  < 0.05 and \*\* $P$  < 0.01 compared to the control group. # $P$  < 0.05 and ## $P$  < 0.01 compared to the conventional or formulated curcumin treatment group. \$ $P$  < 0.05 and \$\$ $P$  < 0.01 compared to the sorafenib treatment group. (B) Hep3B cells were treated with 10  $\mu$ M of sorafenib with or without 30  $\mu$ M of conventional curcumin for 48 h. Post-treatment, Hep3B cells were stained with 2  $\mu$ g/mL of PI for 30 min, and 10,000 cells were examined by flow cytometry. The percentages of cells at different phases of the cell cycle were quantified using WinMDI 2.8 software. The data are presented as the mean  $\pm$  SEM. \* $P$  < 0.05 compared to the control group. Hep3B cells were treated with 10  $\mu$ M of sorafenib with or without 30  $\mu$ M of conventional curcumin for 48 h. Anti-caspase-3 antibody (C) and anti-LC3 antibody (D) were used for western blotting.  $\beta$ -actin was used as a loading control. Quantification of cleavage-caspase-3 and LC3-II protein expression from independent experiments is presented as the mean  $\pm$  SEM. All results are representative of three independent experiments. MTT, 3-(4,5-cimethylthiazol-2-yl)-2,5-diphenyl tetrazolium bromide; SEM, standard error of the mean.



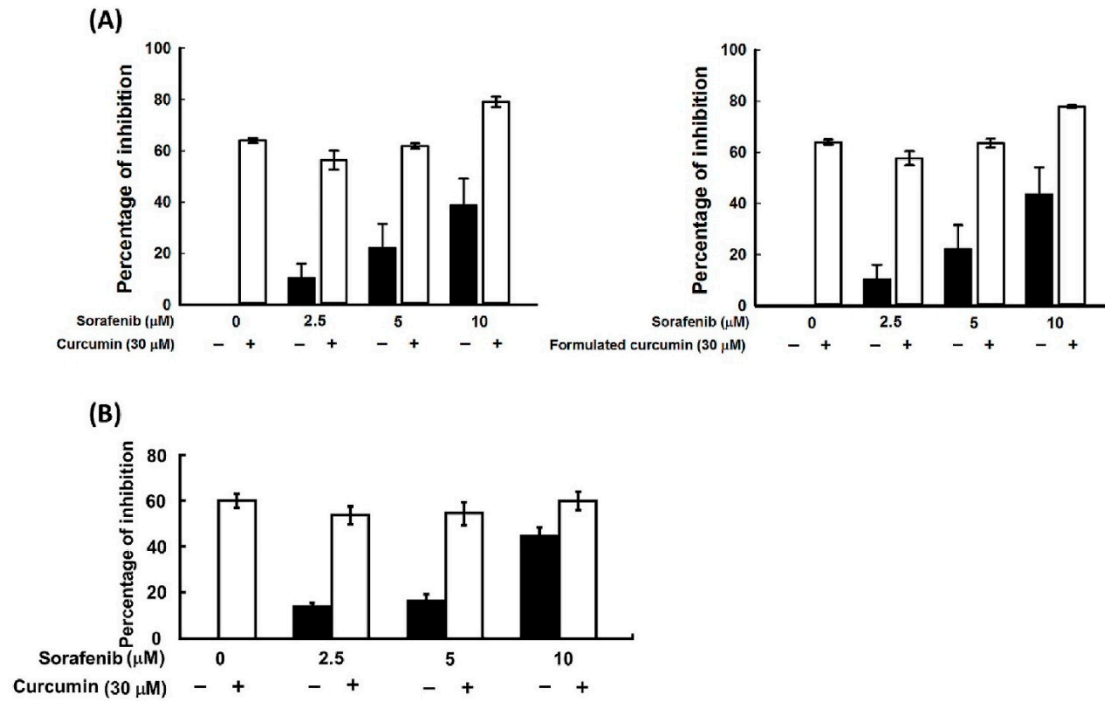

**Supplementary Figure 6.** Effect of sorafenib with or without curcumin/formulated curcumin on Mahlavu and Hep3B cell viability. (A) Mahlavu and (B) Hep3B cells were treated with various concentrations (0, 2.5, 5, 10  $\mu\text{M}$ ) of sorafenib with or without 30  $\mu\text{M}$  curcumin (conventional)/formulated curcumin for 48 hours. Percentage of inhibition on Mahlavu and Hep3B cells was measured by MTT assay. Data are presented as means  $\pm$  SEM. Results are representative of three independent experiments.



**Table 1.** Comparison between our study and previous studies on improvement of solubility/oral bioavailability of curcumin formulation.

|                  | Result and analytical method                                                                                                                                                                                                                                                                                         |                                                                                                                                                                                                         | Title                                                                                                                                                                                                                         | Authors and Journal |
|------------------|----------------------------------------------------------------------------------------------------------------------------------------------------------------------------------------------------------------------------------------------------------------------------------------------------------------------|---------------------------------------------------------------------------------------------------------------------------------------------------------------------------------------------------------|-------------------------------------------------------------------------------------------------------------------------------------------------------------------------------------------------------------------------------|---------------------|
| <b>Our study</b> | Pharmacokinetic study displayed that the oral bioavailability of the formulated curcumin with ratio of 95% curcumin-PVP K30 at 1:10 increased up to 847-fold compared with curcumin.                                                                                                                                 | Rat plasma samples were analyzed by the high-performance liquid chromatography (HPLC), followed by LC-MS system.                                                                                        | Bioactivity evaluation of a novel formulated curcumin                                                                                                                                                                         | This study.         |
| Previous study   | Curcumin was practically insoluble in water. At 1:6 and 1:8 curcumin-PVP K-30 solid dispersions, the increase in curcumin solubility was approximately 4- and 5-fold, respectively, compared with 1:2 curcumin-PVP K-30.                                                                                             | Solubility studies were performed in simulated gastric fluid without pepsin or simulated intestinal fluid without pancreatin.                                                                           | Increased Solubility, Dissolution and Physicochemical Studies of Curcumin-Polyvinylpyrrolidone K-30 Solid Dispersions                                                                                                         | [1]                 |
|                  | The combination of hydrophilic carrier, cellulosic derivatives and natural antioxidants (CHC) showed a 45.9-fold higher absorption over unformulated standardized curcumin mixture (CS).                                                                                                                             | Fifteen subjects were recruited for this study of which twelve subjects completed the study. The blood plasma samples were evaluated by tandem mass spectrometry detection (HPLC/MS/MS).                | Comparative absorption of curcumin formulations                                                                                                                                                                               | [2]                 |
|                  | The components Curcuminoid Turmeric Matrix Formulation in this study were combined with the curcuminoids by a unique patent-pending process of polar-nonpolar-sandwich technology. Curcumin in a natural turmeric matrix had approximately a 10-fold enhanced bioavailability compared to unformulated 95% curcumin. | Twelve human healthy male adults were included in the study. Analyses of curcuminoids in plasma sample were carried out by ultra-performance liquid chromatography (UPLC).                              | A Novel Highly Bioavailable Curcumin Formulation Improves Symptoms and Diagnostic Indicators in Rheumatoid Arthritis Patients: A Randomized, Double-Blind, Placebo-Controlled, Two-Dose, Three-Arm, and Parallel-Group Study. | [3]                 |
|                  | The amount of total curcumin that was absorbed as represented by the area under the curve (AUC)/mg administered curcumin for the study product was 94 times greater than for the 95% unformulated curcumin.                                                                                                          | Twelve human healthy male adults were included in the study. (6 male and 6 female). The samples were analyzed by high-performance liquid chromatography–tandem mass spectrometry (HPLC)                 | A Comparative Pharmacokinetic Assessment of a Novel Highly Bioavailable Curcumin Formulation with 95% Curcumin: A Randomized, Double-Blind, Crossover Study                                                                   | [4]                 |
|                  | A sensitive, specific and reliable LC–MS/MS assay for the determination of curcumin and demethoxycurcumin in herbal extracts and curcumin in rat plasma was developed in this study. The method was applied in the                                                                                                   | Two groups of rats were used for the experiments. One group of rats was given orally curcumin (500 mg/kg), and the other group was intravenously injected curcumin (10 mg/kg) through the femoral vein. | Oral bioavailability of curcumin in rat and the herbal analysis from <i>Curcuma longa</i> by LC–MS/MS                                                                                                                         | [5]                 |

|                                                                                                                                                                                                                                                                                                                                |                                                                                                                                                                                                                                                                                                                                                                                                                                                                                                          |                                                                                                             |     |
|--------------------------------------------------------------------------------------------------------------------------------------------------------------------------------------------------------------------------------------------------------------------------------------------------------------------------------|----------------------------------------------------------------------------------------------------------------------------------------------------------------------------------------------------------------------------------------------------------------------------------------------------------------------------------------------------------------------------------------------------------------------------------------------------------------------------------------------------------|-------------------------------------------------------------------------------------------------------------|-----|
| pharmacokinetic study in freely moving rat and its oral bioavailability was about 1%.                                                                                                                                                                                                                                          |                                                                                                                                                                                                                                                                                                                                                                                                                                                                                                          |                                                                                                             |     |
| PLGA and PLGA-PEG nanoparticles increased the curcumin bioavailability by 15.6- and 55.4-fold, respectively.                                                                                                                                                                                                                   | A LC-MS/MS method was developed and validated to quantify curcumin in rat plasma. The nanoparticles were orally administered at a single dose in rats, and the pharmacokinetic parameters were evaluated and compared with the curcumin aqueous suspension.                                                                                                                                                                                                                                              | Pharmacokinetics of curcumin-loaded PLGA and PLGA-PEG blend nanoparticles after oral administration in rats | [6] |
| The plasma AUC <sub>0-120min</sub> for curcumin after administration of Meriva was five-fold higher than that for unformulated curcumin. It is conceivable that the improved bioavailability of curcumin, when administered as a complex with phospholipid increases the potential scope of medical applications for curcumin. | Rats received curcumin in unformulated or Meriva form at a dose of 340 mg/kg (in terms of curcumin) by oral gavage. Curcumin and species tentatively characterized as curcumin glucuronide, curcumin sulfate, tetrahydrocurcumin and hexahydrocurcumin were detected in plasma, intestinal mucosa and liver of rats after administration of either intervention. The identity of curcuminoids was verified by negative ion electrospray tandem mass spectrometry employing multiple reaction monitoring. | Comparison of systemic availability of curcumin with that of curcumin formulated with phosphatidylcholine   | [7] |

**Table 2. Comparison of pharmacokinetic parameters of curcumin in rat plasma following oral administration.**

| Parameters                     | Curcumin<br>( <i>n</i> = 5)<br>500 mg/kg | Formulated Curcumin ( <i>n</i> = 6)<br>60 mg/kg | Curcumin ( <i>n</i> = 5)[6]<br>50 mg/kg | Curcumin ( <i>n</i> = 3)[5]<br>340 mg/kg | Curcumin ( <i>n</i> = 6)[7]<br>500 mg/kg |
|--------------------------------|------------------------------------------|-------------------------------------------------|-----------------------------------------|------------------------------------------|------------------------------------------|
| C <sub>max</sub> (ng/mL)       | 0.704 ± 0.272                            | 109.20 ± 41.65                                  | 4.07 ± 0.56                             | 2.39 ± 1.66                              | 60 ± 10                                  |
| AUC <sub>0-t</sub> (h × ng/mL) | 1.1 ± 1.2                                | 111.8 ± 16.4                                    | 8.76 ± 1.86                             | 80                                       | 60 ± 10                                  |
| T <sub>max</sub> (h)           | 1.25 ± 0.83                              | 0.38 ± 0.14                                     | 0.5                                     | 0.5                                      | 0.70 ± 0.09                              |

The data are expressed as the mean ± SD. C<sub>max</sub>: the maximum plasma concentration; AUC<sub>0-t</sub>: area under the concentration-time curve from the time of drug administration to the last quantifiable concentration; T<sub>max</sub> is the time at which the C<sub>max</sub> is observed.

## References

1. Kaewnopparat, N., et al., *Increased solubility, dissolution and physicochemical studies of curcumin-polyvinylpyrrolidone K-30 solid dispersions*. World Acad. Sci. Eng. Technol., 2009. **31**: p. 225-230.
2. Jager, R., et al., *Comparative absorption of curcumin formulations*. Nutr J, 2014. **13**: p. 11.
3. Amalraj, A., et al., *A Novel Highly Bioavailable Curcumin Formulation Improves Symptoms and Diagnostic Indicators in Rheumatoid Arthritis Patients: A Randomized, Double-Blind, Placebo-Controlled, Two-Dose, Three-Arm, and Parallel-Group Study*. J Med Food, 2017. **20**(10): p. 1022-1030.
4. Stohs, S.J., et al., *A Comparative Pharmacokinetic Assessment of a Novel Highly Bioavailable Curcumin Formulation with 95% Curcumin: A Randomized, Double-Blind, Crossover Study*. J Am Coll Nutr, 2018. **37**(1): p. 51-59.
5. Yang, K.Y., et al., *Oral bioavailability of curcumin in rat and the herbal analysis from Curcuma longa by LC-MS/MS*. J Chromatogr B Analyt Technol Biomed Life Sci, 2007. **853**(1-2): p. 183-9.
6. Khalil, N.M., et al., *Pharmacokinetics of curcumin-loaded PLGA and PLGA-PEG blend nanoparticles after oral administration in rats*. Colloids Surf B Biointerfaces, 2013. **101**: p. 353-60.
7. Marczylo, T.H., et al., *Comparison of systemic availability of curcumin with that of curcumin formulated with phosphatidylcholine*. Cancer Chemother Pharmacol, 2007. **60**(2): p. 171-7.
